# Supplementary material for: Perovskite La0.75Sr0.25Cr0.5Mn0.5O3−δ sensitized SnO2 fiber-in-tube scaffold: highly selective and sensitive formaldehyde sensing
Source: Royal Society of Chemistry journal article supplement (doi:10.1039/c8ta02725k), 2018-01-01
Supplement: c8ta02725k1.pdf [file c8ta02725k1.pdf]

## Supporting Information

### **Perovskite $\text{La}_{0.75}\text{Sr}_{0.25}\text{Cr}_{0.5}\text{Mn}_{0.5}\text{O}_{3-\delta}$ Sensitized $\text{SnO}_2$ Fiber-in-Tube Scaffold: Highly Selective and Sensitive Formaldehyde Sensing**

*By Joon-Young Kang, Ji-Soo Jang, Won-Tae Koo, Jongsu Seo, Yoonseok Choi, Min-Hyeok Kim, Dong-Ha Kim, Hee-Jin Cho, WooChul Jung and Il-Doo Kim\**

#### **Contents**

1. SEM image of pristine  $\text{SnO}_2$  NTs, 2.5 wt%-, and 30 wt% LSCM@ $\text{SnO}_2$  FITs.
2. SAED pattern of LSCM@ $\text{SnO}_2$  FITs.
3. XRD analysis data of LCO particles, LCO@ $\text{SnO}_2$  FITs.
4. SEM image of LCO particles, LSCM@ $\text{SnO}_2$  NFs, LCO@PVP/Sn as-spun NF and LCO@ $\text{SnO}_2$  FITs.
5. Formaldehyde sensing tests as a function of loading amount of LSCM particles and temperature-dependent sensing tests.
6. Resistance variation graphs and response times of LSCM@ $\text{SnO}_2$  FITs towards 1–5 ppm of formaldehyde gases.
7. Recovery times of  $\text{SnO}_2$  NFs,  $\text{SnO}_2$  NTs, LCO@ $\text{SnO}_2$  NFs, LSCM@ $\text{SnO}_2$  NFs, and LSCM@ $\text{SnO}_2$  FITs and resistance variation of LSCM@ $\text{SnO}_2$  FITs after injection of air in the concentration of 1-5 ppm of formaldehyde.
8. UPS analysis of LSCM particles.
9. XPS spectra of (a) Mn 2p of pristine LSCM particles and (b) Sn 3d of LSCM@ $\text{SnO}_2$  FITs after heating at 400 °C.

10. XPS spectra of O 1s of LCO and LSCM particles and spectra feature table of O 1s.

11. Resistance variation graph of LSCM particles during 1-5 ppm of formaldehyde exposure.

Table 1. Resistance values of LSCM@SnO<sub>2</sub> FITs before and after injection of formaldehyde gas.

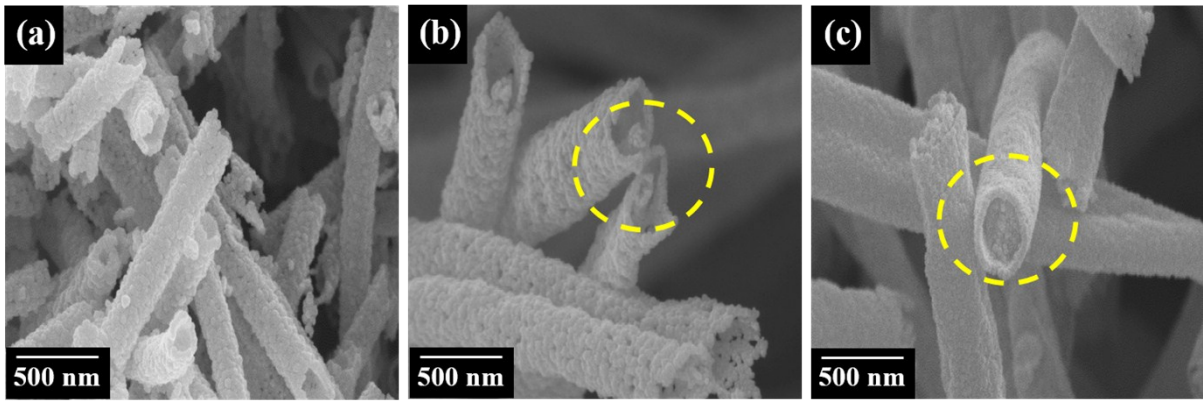

**Fig. S1.** SEM image of a) pristine SnO<sub>2</sub> NTs, b) 2.5 wt%-, and c) 30 wt% LSCM@SnO<sub>2</sub> FITs.

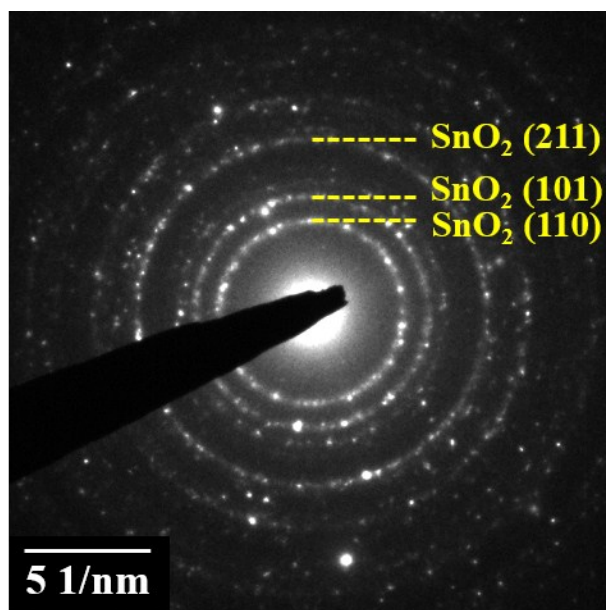

**Fig. S2.** SAED pattern of LSCM@SnO<sub>2</sub> FITs.

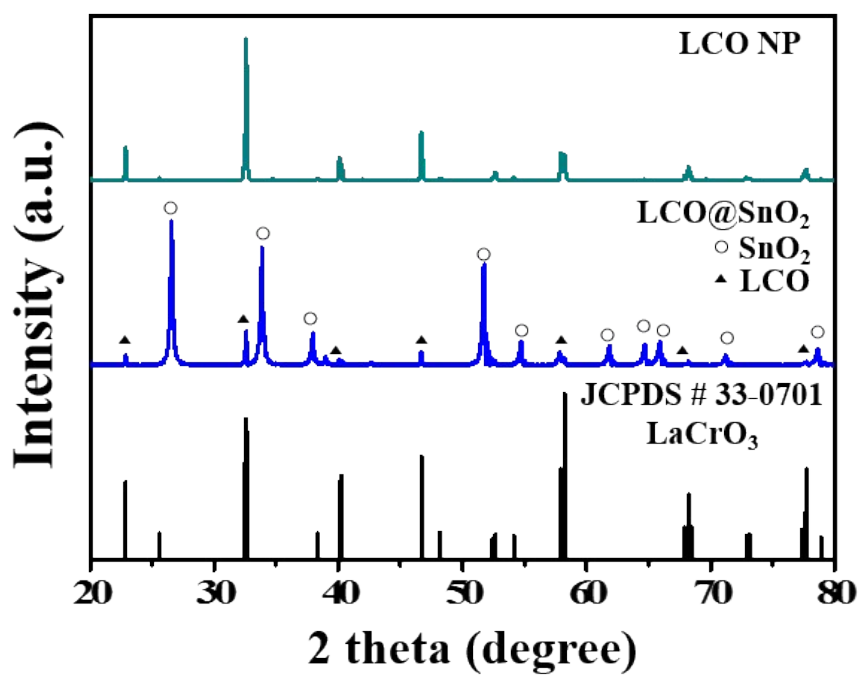

**Fig. S3.** XRD analysis data of LCO particles and LCO@SnO<sub>2</sub> FITs.

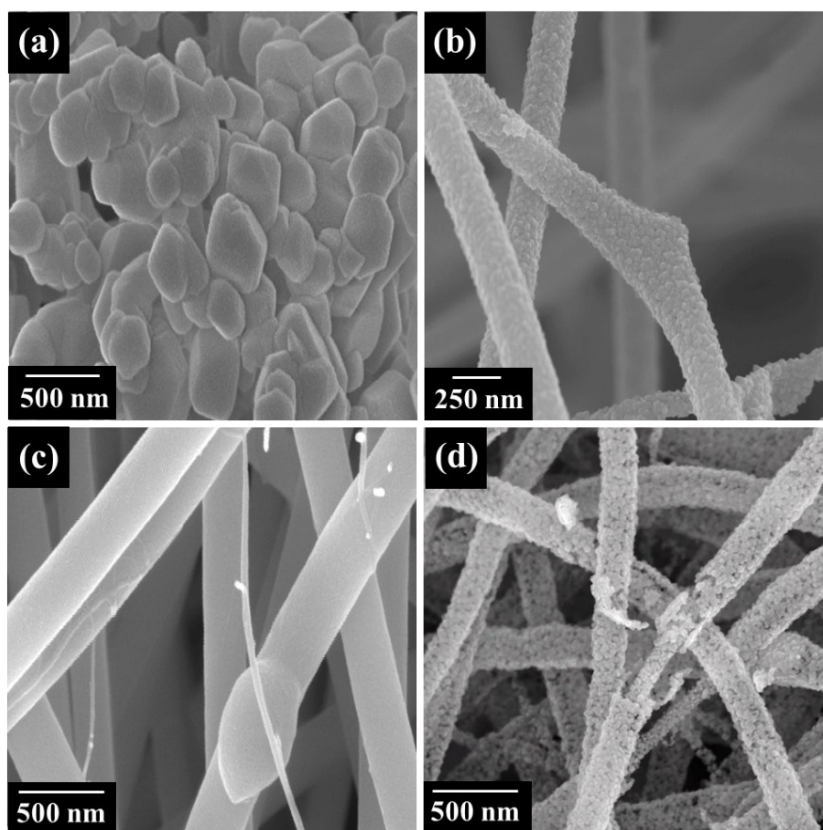

**Fig. S4.** SEM image of a) LCO particles, b) LSCM@SnO<sub>2</sub> NFs, c) as-spun LCO@PVP/Sn NFs and d) LCO@SnO<sub>2</sub> FITs.

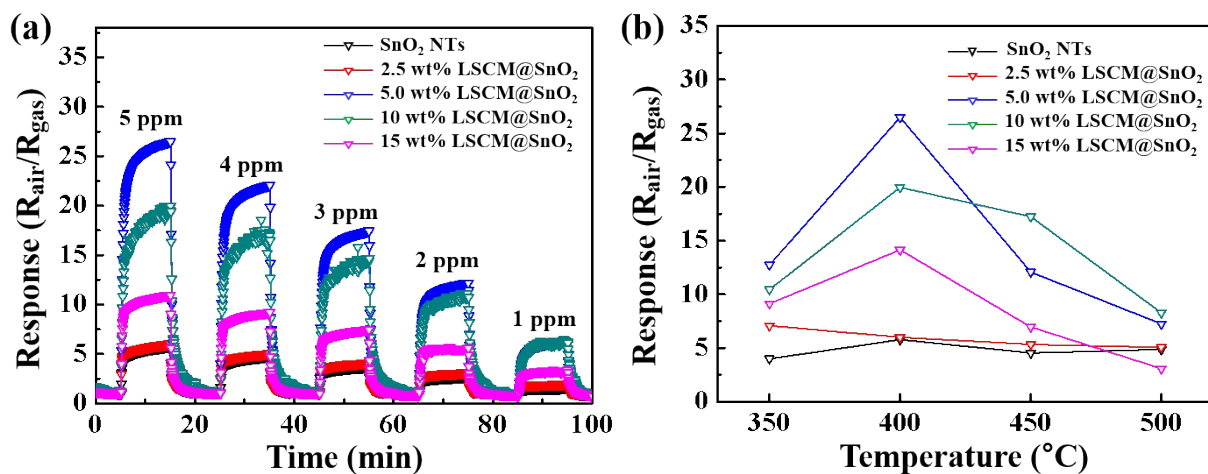

**Fig. S5.** a) Formaldehyde sensing tests at 400 °C as a function of loading amount of LSCM particles and b) temperature-dependent sensing tests toward 5 ppm of formaldehyde.

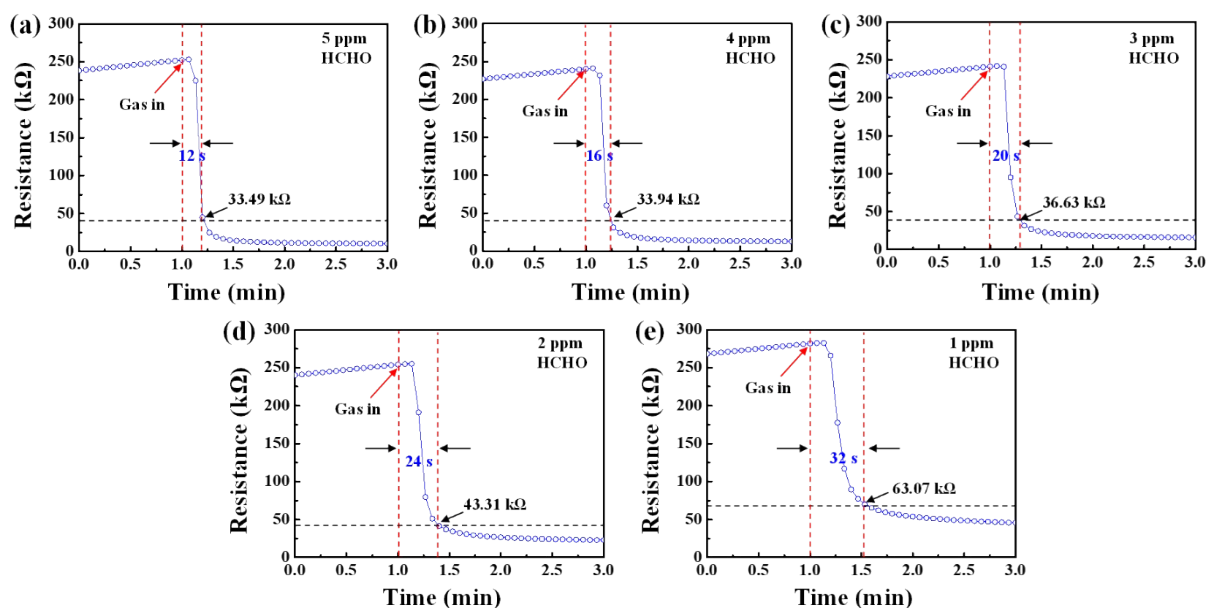

**Fig. S6.** Resistance variation graphs and response times of LSCM@SnO<sub>2</sub> FITs towards a) 5 ppm, b) 4 ppm, c) 3 ppm, d) 2 ppm, and e) 1 ppm of formaldehyde gases.

The response time is defined as the time taken for the resistance to decrease by 90% of maximum resistance difference ( $R_{\text{air}} - R_{\text{gas}}$ ) after injecting reducing gases. In case of 5 ppm formaldehyde exposure,  $R_{\text{air}}$  and  $R_{\text{gas}}$  are 253.03 kΩ and 9.10 kΩ, respectively. Therefore, 90% of  $R_{\text{air}} - R_{\text{gas}}$  is 219.54 kΩ, and the response time is the time taken for the resistance to decrease 253.03 kΩ to 33.49 kΩ (253.03 - 219.54 kΩ). As indicated in Fig. S6a, the response time of LSCM@SnO<sub>2</sub> FITs is 12 s, in case of 5 ppm formaldehyde exposure. The same calculation method is applied to 4, 3, 2, and 1 ppm of formaldehyde exposure, and to the control samples (pristine SnO<sub>2</sub> NFs, SnO<sub>2</sub> NTs, LSCM@SnO<sub>2</sub> NFs, and LCO@SnO<sub>2</sub> FITs).



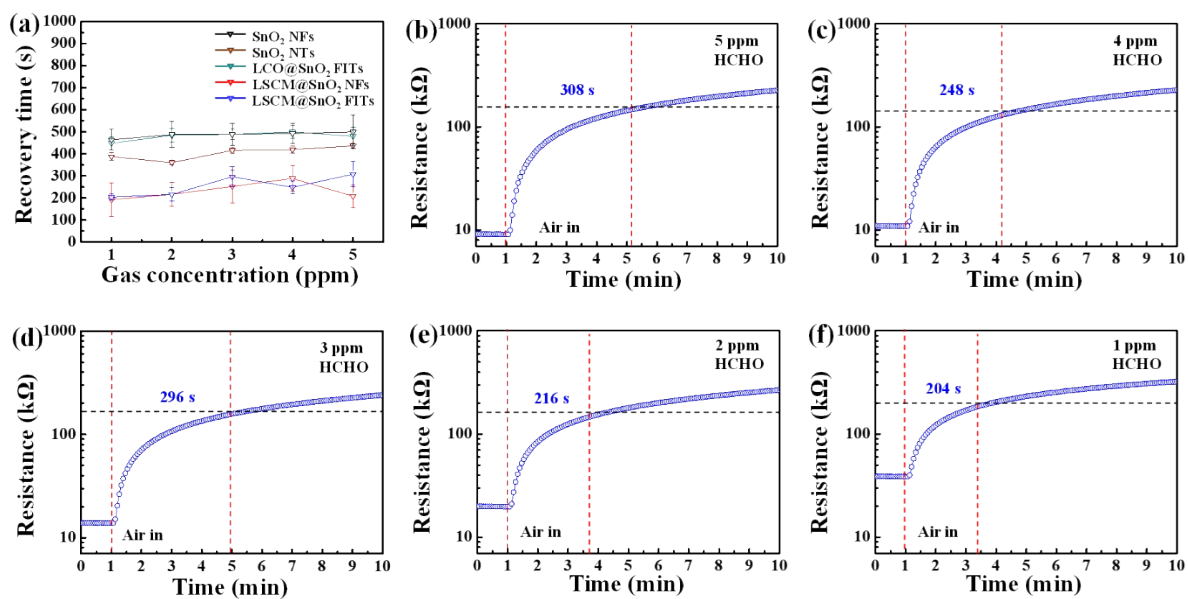

**Fig. S7.** a) Recovery times of SnO<sub>2</sub> NFs, SnO<sub>2</sub> NTs, LCO@SnO<sub>2</sub> NFs, LSCM@SnO<sub>2</sub> NFs, and LSCM@SnO<sub>2</sub> FITs in the concentration range of 1–5 ppm. b-f) Resistance variation of LSCM@SnO<sub>2</sub> FITs after injection of air and recovery times in the concentration of 1-5 ppm of formaldehyde.

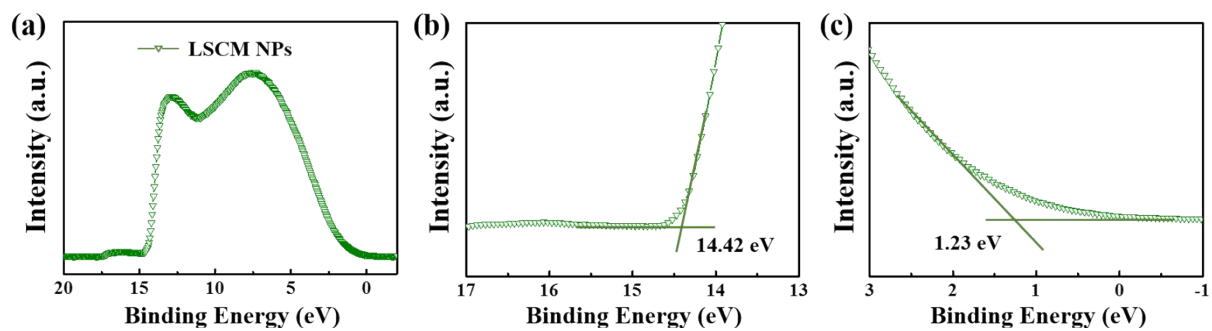

**Figure S8.** UPS analysis of LSCM particles.

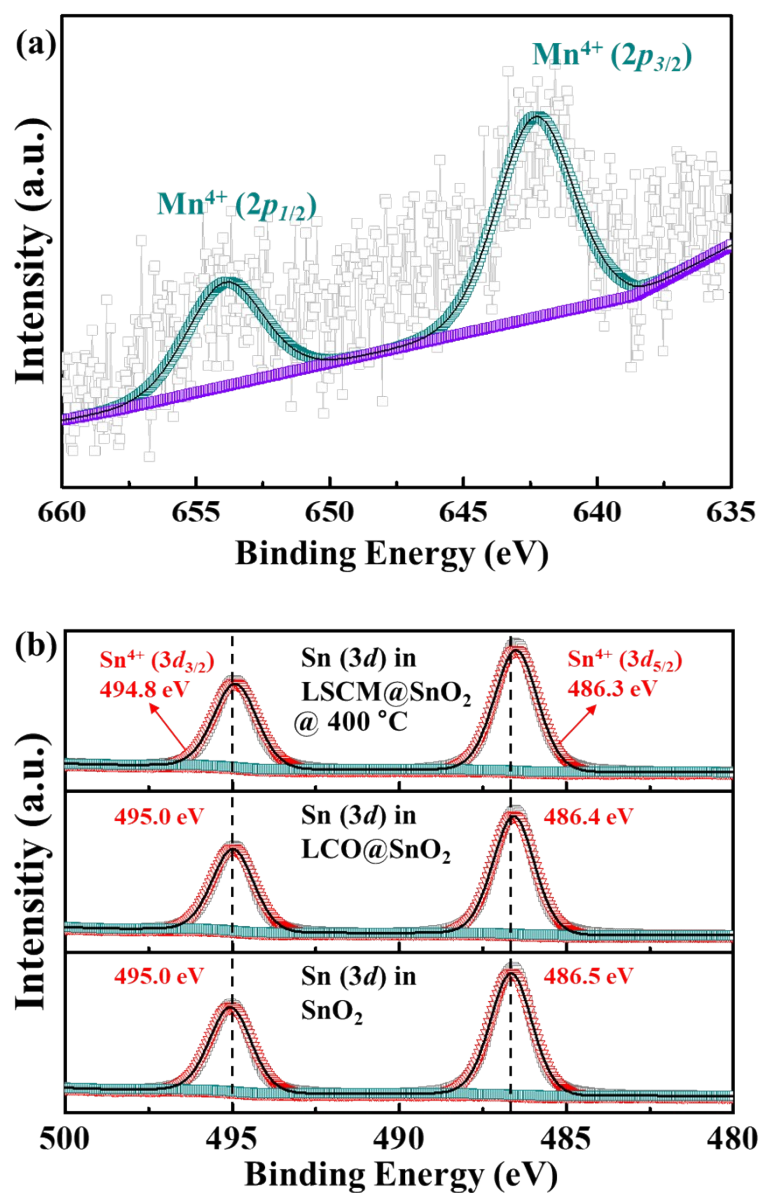

**Figure S9.** XPS spectra of (a) Mn 2p of pristine LSCM particles and (b) Sn 3d of LSCM@SnO<sub>2</sub> FITs after heating at 400 °C.

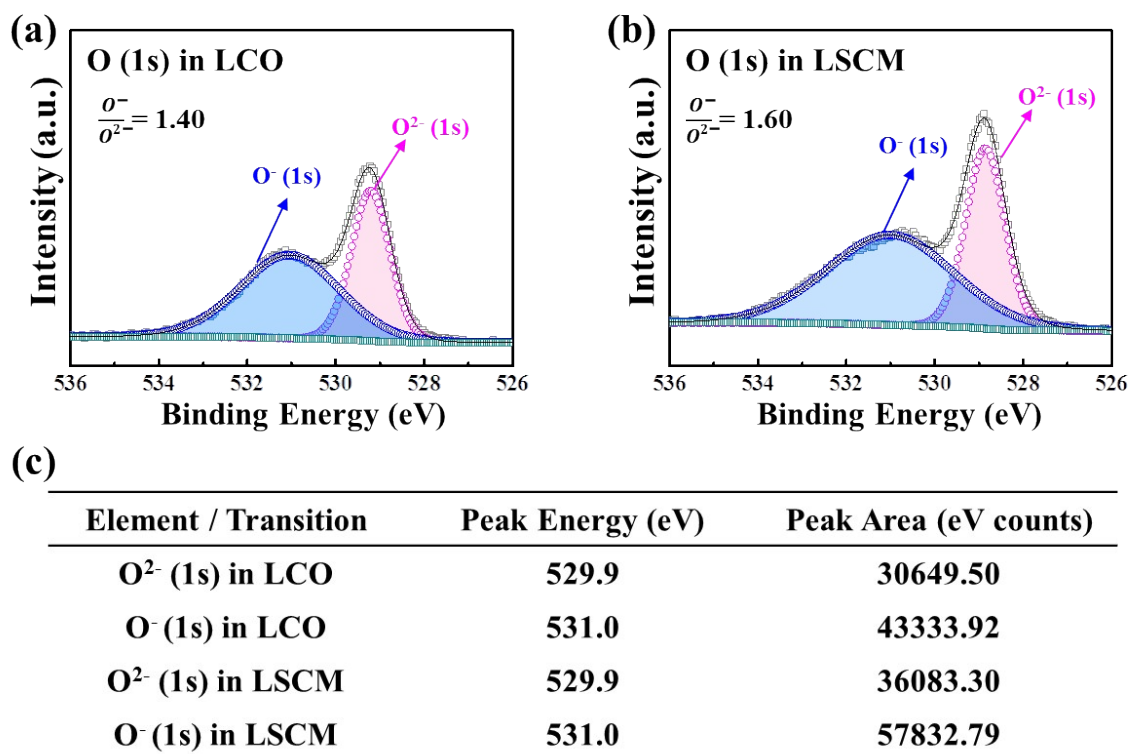

**Figure S10.** XPS spectra of O 1s of a) LCO and b) LSCM particles and c) spectra feature table of O 1s.

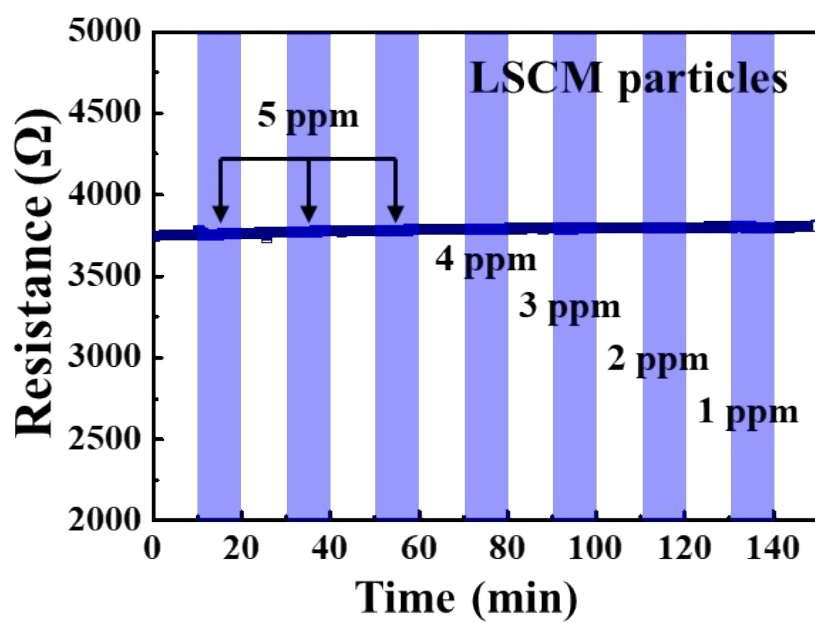

**Figure S11.** Resistance variation graph of LSCM particles toward 1-5 ppm of formaldehyde.

**Table S1.** Resistance values of LSCM@SnO<sub>2</sub> FITs before and after injection of formaldehyde gas.

| Gas concentration (ppm) | Resistance (kΩ)        |                       |        |        |       |       |       |       |       |
|-------------------------|------------------------|-----------------------|--------|--------|-------|-------|-------|-------|-------|
|                         | R <sub>air</sub> (0 s) | R <sub>gas</sub> (4s) | 8 s    | 12 s   | 16 s  | 20 s  | 24 s  | 28 s  | 32 s  |
| 5                       | 253.03                 | 225.13                | 44.94  | 24.94  | 19.31 | 16.60 | 15.01 | 14.00 | 13.31 |
| 4                       | 240.28                 | 241.00                | 231.61 | 60.03  | 30.99 | 23.85 | 20.47 | 18.54 | 17.24 |
| 3                       | 240.99                 | 241.80                | 240.80 | 95.00  | 43.55 | 31.49 | 27.03 | 24.37 | 22.62 |
| 2                       | 254.07                 | 254.90                | 255.06 | 191.07 | 79.44 | 51.06 | 41.35 | 36.71 | 34.08 |
| 1                       | 282.27                 | 282.39                | 177.35 | 116.89 | 89.53 | 77.06 | 69.79 | 65.17 | 61.94 |
